1 Evolution of dispersal can rescue populations from  
2 expansion load

3 Stephan Peischl<sup>1,2,\*</sup>  
4 Kimberly J. Gilbert<sup>2,3</sup>

4 1. Interfaculty Bioinformatics Unit, University of Bern, Baltzerstrasse 6, 3012 Bern,  
5 Switzerland;

6 2. Swiss Institute of Bioinformatics, 1015 Lausanne, Switzerland;

7 3. Institute of Ecology and Evolution, University of Bern, Baltzerstrasse 6, 3012 Bern,  
8 Switzerland;

9 \* Corresponding author; e-mail: [stephan.peischl@bioinformatics.unibe.ch](mailto:stephan.peischl@bioinformatics.unibe.ch).

10 *Keywords:* expansion load, spatial sorting, range expansion.

11 *Manuscript type:* Article.

## 12 **Abstract**

13 Understanding the causes and consequences of range expansions or range shifts has a  
14 long history in evolutionary biology. Recent theoretical, experimental, and empirical  
15 work has identified two particularly interesting phenomena in the context of species  
16 range expansions: (i) gene surfing and the relaxation of natural selection, and (ii) spatial  
17 sorting. The former can lead to an accumulation of deleterious mutations at range  
18 edges, causing an expansion load and slowing down expansion. The latter can create  
19 gradients in dispersal-related traits along the expansion axis and cause an acceleration  
20 of expansion. We present a theoretical framework that treats spatial sorting and gene  
21 surfing as spatial versions of natural selection and genetic drift, respectively. This model  
22 allows us to study analytically how gene surfing and spatial sorting interact, and to  
23 derive the probability of fixation of pleiotropic mutations at the expansion front. We  
24 use our results to predict the co-evolution of mean fitness and dispersal rates, taking  
25 into account the effects of random genetic drift, natural selection and spatial sorting, as  
26 well as correlations between fitness- and dispersal-related traits. We identify a "rescue  
27 effect" of spatial sorting, where the evolution of higher dispersal rates at the leading  
28 edge rescues the population from incurring expansion load.

## 29 Introduction

30 Understanding the demographic, ecological, and evolutionary forces that determine the  
31 evolution of a species range has been a central area of research since the early days of  
32 evolutionary biology (Darwin, 1859; Sexton et al., 2009). Over the last decade, the fact  
33 that species range expansions impact multiple evolutionary and ecological processes in  
34 peripheral populations has been thrown into the spotlight both theoretically and empiri-  
35 cally (see e.g., Bosshard et al., 2017; Brown et al., 2013; Burton et al., 2010; Fronhofer and  
36 Altermatt, 2015; González-Martínez et al., 2017; Hallatschek and Nelson, 2010; Klop-  
37 stein et al., 2006; Peischl et al., 2013; Shine et al., 2011; Travis et al., 2007; Van Dyken  
38 et al., 2013; Weiss-Lehman et al., 2017). This shift in thinking about the dynamic pro-  
39 cesses forming species ranges has led to the observation that evolutionary and ecological  
40 dynamics at the front of a range expansion can differ considerably from those in the core  
41 of a species range. The set of traits that allow a species to colonize and expand its range  
42 might thus be very different from those that allow a species to successfully persist in  
43 new habitat. In this work, we study the co-evolution of two traits that are highly rel-  
44 evant in the context of species range expansion, namely an individual's fitness and its  
45 dispersal abilities.

46 A first key process in determining evolutionary processes during a range expansion  
47 is genetic drift. In a seminal paper, Edmonds et al. (2004) showed that strong genetic  
48 drift at the front of range expansions can lead to the rapid increase of random neutral  
49 variants along the expansion axis, a process now known as gene surfing (Klopfstein  
50 et al., 2006). Gene surfing also affects selected variants (Travis et al., 2007) and can  
51 lead to an accumulation of deleterious mutations in marginal populations (Hallatschek  
52 and Nelson, 2010). This accumulation of deleterious mutations has been termed  
53 expansion load and has been the subject of several theoretical (Gilbert et al., 2017; Peis-  
54 chl et al., 2013; Peischl and Excoffier, 2015; Peischl et al., 2015), experimental (Bosshard  
55 et al., 2017; Weiss-Lehman et al., 2017), and empirical studies (González-Martínez et al.,  
56 2017; Henn et al., 2016; Peischl et al., 2018; Willi et al., 2018). Expansion load stems  
57 from the repeated founder events at expanding wave fronts that reduce the efficiency of  
58 selection which would otherwise purge most incoming deleterious mutations. In this  
59 sense, the evolutionary dynamics at the front of expanding populations are similar to  
60 that of mutation accumulation experiments (Bosshard et al., 2017). Several factors con-  
61 tribute to the dynamics and severity of expansion load. Theoretical work has identified  
62 that fast-growing species with low dispersal rates are most likely to accumulate harm-

63 ful mutations (Peischl et al., 2013). The distribution of fitness effects and the degree of  
64 dominance of mutations also have a strong impact on the evolution of expansion load  
65 (Gilbert et al., 2018; Peischl et al., 2013; Peischl and Excoffier, 2015).

66 A second important process that can arise during range expansions is the evolution  
67 of dispersal-related traits (see, e.g., Bouin and Calvez, 2014; Deforet et al., 2017; Phillips  
68 and Perkins, 2017; Phillips et al., 2006; Simmons and Thomas, 2004; Travis and Dytham,  
69 2002), which has been termed spatial sorting (Shine et al., 2011). When a population  
70 possesses heritable variation in dispersal abilities, colonists at the range front result dis-  
71 proportionately from individuals with greater dispersal propensity. Individuals are thus  
72 sorted over space according to their dispersal abilities, with more dispersive individuals  
73 at the range edge, similar to the increase in frequency of beneficial mutations over time  
74 due to natural selection (Phillips and Perkins, 2017; Shine et al., 2011). Spatial sorting  
75 thus increases dispersal propensity at the front as these individuals mate assortatively,  
76 potentially accelerating the speed of a range expansion (Burton et al., 2010; Cwynar and  
77 MacDonald, 1987; Hughes et al., 2003; Phillips et al., 2008; Travis et al., 2007). Spatial  
78 sorting has most notably been described in the invasive expansion of cane toads (*Rhinella*  
79 *marina*) across Australia (Phillips et al., 2006), but has been observed in several other sys-  
80 tems (Fronhofer and Altermatt, 2015; Simmons and Thomas, 2004; Van Ditmarsch et al.,  
81 2013; Weiss-Lehman et al., 2017).

82 A few theoretical studies have focused on the co-evolution of fitness- and dispersal-  
83 related traits during range expansions. Using individual-based simulations, Burton et al.  
84 (2010) studied the evolution of resource allocation for three life-history traits during  
85 range expansions: dispersal, reproduction, and competitive ability. They found that  
86 dispersal and reproductive abilities generally increase on the expansion front, whereas  
87 competitive abilities decrease as compared to the core. Using a deterministic serial  
88 founder effect model with discrete demes, Phillips and Perkins (2017) showed that a  
89 mutation that alters both fitness and dispersal abilities will be positively selected on an  
90 expansion front if the product of migration rate and fitness is greater than that of an in-  
91 dividual with the wild-type allele. Deforet et al. (2017) study the evolution of expansion  
92 speed using a deterministic reaction-diffusion type model in continuous space, finding  
93 that a mutation can invade the expansion front if it leads to an increase in expansion  
94 speed. The expansion speed in their model is proportional to the square root of the  
95 product of migration rate and growth rate, and hence any mutation that increases the  
96 product of migration rate and growth rate will be positively selected at the expansion

97 front. Despite modelling differences, the conclusions of Phillips and Perkins (2017) and  
98 Deforet et al. (2017) are strikingly similar, in the sense that the product of fitness (or a  
99 fitness-related trait such as growth rate) and dispersal rates is what determines whether  
100 a mutation is adaptive for expansion or not. The reason for their similar conclusions  
101 is that both studies focus on a deterministic model with two key aspects: the ability of  
102 reaching the front (determined by dispersal rates) and the chance of surviving on the  
103 front (determined by fitness or growth rates). It remains unclear, however, how genetic  
104 drift, mutation rates, correlations between traits, and the relationship between fitness,  
105 growth rates and expansion speed may influence evolutionary dynamics at expansion  
106 fronts.

107 There is striking evidence for both spatial sorting and expansion load from experi-  
108 mental evolution studies. Using *Escherichia coli*, Bosshard et al. (2017) has shown that  
109 fitness decreased during expansion on agar plates due to a random accumulation of new  
110 incoming mutations. Intriguingly, there are signals for an increase in expansion speed  
111 during early phases of the experiment, potentially due to loss of function in genes re-  
112 lated to flagella production, which might allow bacteria to reach the expansion front  
113 more easily (Bosshard et al., 2018). However, in the long term, expansion speed was  
114 found to decrease over time due to reduced growth rates and competitive abilities, cor-  
115 roborating theoretical results (Peischl et al., 2015). Van Ditmarsch et al. (2013) performed  
116 similar experiments with *Pseudomonas aeruginosa* where they found strong signals of con-  
117 vergent evolution of a "hyperswarming" phenotype with increased numbers of flagella  
118 per individual. Even though growth rates in the evolved strains were lower as com-  
119 pared to the wild-type, the expanded populations out-competed ancestral populations,  
120 seemingly due to their increased dispersal abilities (Deforet et al., 2014). In addition to  
121 using different species, another key difference between these two experimental studies  
122 is the viscosity of the agar environment, and hence the mechanisms of dispersal in the  
123 bacteria. While Bosshard et al. (2017) used solid agar (at a concentration of 1.5% (w/v))  
124 where bacteria are "pushed" to the front, Van Ditmarsch et al. (2013) used soft agar (at  
125 a concentration of 0.3% (w/v)) that allowed for active dispersal of bacteria via swarm-  
126 ing. The extent to which these differences have contributed to the different outcomes of  
127 the two experiments remains unclear. These examples of disparate outcomes for evo-  
128 lution of dispersal and fitness emphasize the need to fully understand the theoretical  
129 underpinnings of expansion load and spatial sorting and to identify when they may  
130 complement or disrupt each other.

131 In this study, we derive theoretical expectations for when and how interactions be-  
132 tween genetic drift, natural selection, and spatial sorting may unfold. Our framework  
133 allows a detailed analytic treatment and can be used to predict the co-evolutionary  
134 dynamics at expansion fronts. A key analytic result is the derivation of the fixation  
135 probability of a pleiotropic mutation affecting both fitness and dispersal-related traits.

## 136 Model and Results

137 We model the evolutionary dynamics of allele frequencies at the front of a one-dimensional  
138 range expansion, combining the approaches of [Peischl et al. \(2013, 2015\)](#); [Phillips and](#)  
139 [Perkins \(2017\)](#); [Slatkin and Excoffier \(2012\)](#). Consider an infinite stepping-stone model  
140 of demes, labelled  $d = 1, 2, 3, \dots, n$ . The carrying capacity of each deme is denoted  $K$ .  
141 Initially, only a subset of demes is colonized, and all other demes are empty.  $d_f(t)$  will  
142 denote the most recently colonized deme at time  $t$ , which we call the expansion front.  
143 Individuals are haploid, and we consider a single locus with two alleles denoted  $a$  and  
144  $A$ . These alleles can affect either fitness or dispersal rates, or both. Let  $p$  denote the  
145 frequency of the mutant allele  $A$  at the expansion front, that is, in deme  $d_f$ . Note that  
146 the dependence on  $t$  is omitted for the sake of simplicity. The fitness of wild-type and  
147 mutant alleles are denoted  $w_a$  and  $w_A$ , respectively, and the selection coefficient  $s$  of the  
148 mutant allele  $A$  is given by  $s = \frac{w_A}{w_a} - 1$ . During the dispersal phase, wild-type individ-  
149 uals migrate to neighboring demes with probability  $m_a$  and mutants with probability  
150  $m_A$ . Analogous to the selection coefficient  $s$ , we define the effect on dispersal rate from  
151 a mutant allele as  $s_m = \frac{m_A}{m_a} - 1$ .

152 A key simplifying assumption in our model is that we model the colonization of  
153 new demes as discrete founder events occurring every  $T$  generations (see e.g., [Peischl](#)  
154 [et al., 2013, 2015](#)). When a deme is at carrying capacity, a propagule of size  $F$  is placed  
155 into the next empty deme  $d_f(t) + 1$ . The population then grows exponentially for  $T$   
156 generations until the new deme's carrying capacity is reached. The size of the propagule  
157 is determined by the dispersal abilities of individuals at the expansion front. Let  $\bar{m}_f =$   
158  $pm_A + (1 - p)m_a$  denote the average migration rate in the population. The size of the  
159 propagule is then  $F = K\bar{m}_f/2$ . The factor  $1/2$  is due to the fact that individuals migrate  
160 to each of the two neighboring demes with the same probability. During the growth  
161 phase, migration is ignored. Assuming exponential growth at rate  $r = \log(R)$ , this yields  
162  $T = \log(2/\bar{m}_f)/r$  ([Peischl et al., 2013](#)). This model is a good approximation to range  
163 expansions with continuous gene flow when growth rates are larger than migration

164 rates (Peischl et al., 2013). We also consider the limiting case where  $r$  is so large that  
 165 a deme grows to carrying capacity within a single generation  $T = 1$ , independently  
 166 of the number of founders  $F$ . Figure 1 shows a sketch of the model that illustrates  
 167 how mutations can be positively selected on expanding wave fronts based on either an  
 168 increase in migration rates (Figure 1A) or an increase in relative fitness (Figure 1B).

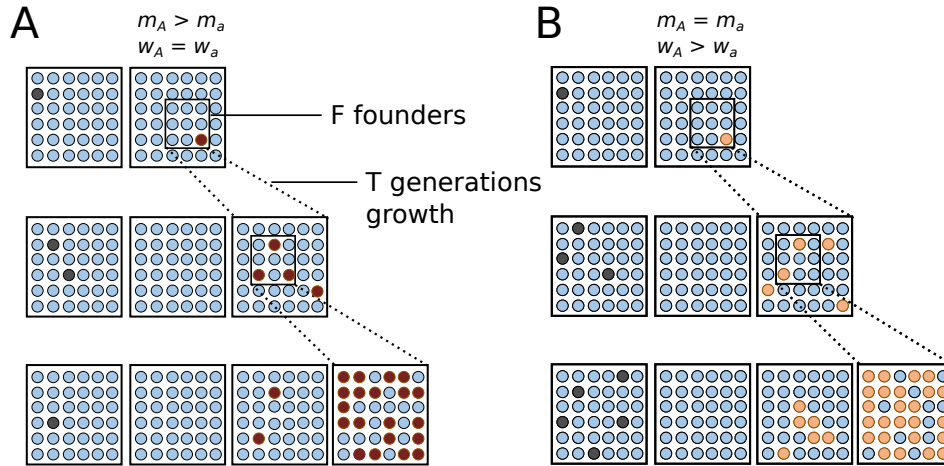

Figure 1: Sketch of the model. A: a mutation with higher migration rate (red) but same fitness as wild-type individuals (blue). The mutation can increase in frequency at the expansion front because it is more likely to be among the  $F$  founders as compared to wild-type mutations. B: a mutation with higher fitness than the wild type, but with same migration rate. The mutation (orange) has the same probability to be among the  $F$  founders as the wild type (blue), but it can spread at the expansion front due to higher reproductive success during the  $T$  generations of growth during which natural selection acts. In both panels, dark gray circles show the evolution of an equivalent mutation in the core of the species range for comparison.

## 169 Fixation of new mutations

170 We show in Appendix A that the probability of fixation of a mutation with initial fre-  
 171 quency  $p_0$  at the expansion front is given by

$$\frac{e^{-4N_e s_e p_0} - 1}{e^{-4N_e s_e} - 1}, \quad (1)$$

172 where we define an effective selection coefficient  $s_e = sT + s_m$  and an effective popu-  
 173 lation size  $N_e = F$ . Equation (1) shows that mutations can be under positive selection  
 174 at the expansion front for two reasons: (i) increasing an individual's fitness ( $s > 0$ ) or  
 175 (ii) increasing the migration rate ( $s_m > 0$ ). If  $s_m = 0$ , we recover the fixation probability  
 176 on the expansion front derived in Peischl et al. (2013). Then, natural selection is most  
 177 efficient when  $R$  is small (Figure 2B) and  $\bar{m}_f$  is large (Peischl et al., 2013, Figure S4B).  
 178 If  $s = 0$ , the fixation probability of a mutation modifying the dispersal probability by

179 a factor of  $1 + s_m$  is equivalent to that of a mutation with selective advantage  $s_m$  in a  
180 stationary population of size  $F$  (Kimura, 1962). This shows that spatial sorting can in-  
181 deed be viewed as an analog to natural selection across space as proposed by simulation  
182 studies (Shine et al., 2011) and deterministic models (Phillips and Perkins, 2017). Note  
183 that our model can be seen as a stochastic version of the model presented in Phillips  
184 and Perkins (2017) if  $T = 1$ , i.e., if a new deme is colonized each generation.

185 In the following we denote mutations with  $s_e > 0$  as adaptive for expansion, since  
186 they can spread at the front because of the joint actions of natural selection and spatial  
187 sorting. We refer to mutations with  $s_e < 0$  as maladaptive for expansion since they  
188 can only establish via genetic drift. Equation (1) shows that natural selection is most  
189 efficient if  $\bar{m}_f$  is large and  $R$  is small (see also Peischl et al. 2013). Likewise, spatial  
190 sorting is most efficient if  $\bar{m}_f$  is large because drift during founder events decreases  
191 with increasing migration rates (Figure S2). The growth rate  $R$  has no impact on the  
192 fixation probability if  $s = 0$  (Figure S1), since it only affects the length of the growth  
193 phase during which natural selection acts but not the number of founders,  $F$ , or the  
194 probabilities of individuals to migrate to a new deme.

### 195 **Pleiotropic mutations**

196 We next consider mutations that affect both the fitness as well as the dispersal ability of a  
197 carrier. As expected, mutations that increase both fitness and migration rates ( $s, s_m > 0$ )  
198 are always positively selected (solid lines in Figure 2C) and mutations with  $s, s_m < 0$  are  
199 always negatively selected at the expansion front (dashed lines in Figure 2A). In both  
200 cases, the efficacy of selection for expansion decreases with increasing growth rate  $R$   
201 (Figure S2) because the time  $T$  during which natural selection can act becomes shorter.

202 If there is a trade-off between fitness- and dispersal-related traits such that  $s_m < 0 < s$   
203 or  $s < 0 < s_m$ , the growth rate of the population,  $R$ , affects the strength as well as the  
204 direction of selection for a given mutation (Figure 2). In general, if growth rates are low,  
205 natural selection is more effective than spatial sorting because of the longer periods,  $T$ ,  
206 between consecutive founder events during which selection can act (Figure 2), whereas  
207 spatial sorting is only acting during the sampling of new founders (Figure 1). Thus,  
208 for low  $R$ , fixation probabilities are close to that of mutations with effect  $s$  in stationary  
209 populations of size  $F$ . On the other hand, if  $R$  is large such that  $T$  is close to 1, both  
210 spatial sorting and natural selection contribute equally to the fixation probability (Figure  
211 2), which is then similar to a mutation with effect  $s + s_m$  in a stationary population of size



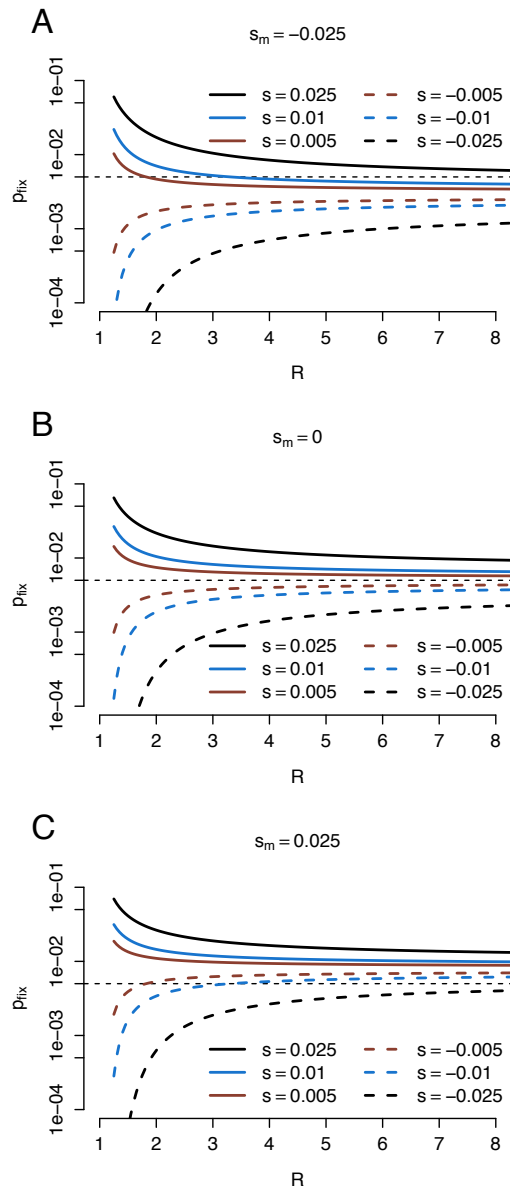

Figure 2: Fixation probability of pleiotropic mutations as a function of population growth rate. Dashed lines indicate deleterious mutations (negative selection coefficient,  $s$ ) while solid lines indicate beneficial mutations.

212 *F*. We find that a mutation with  $s > 0 > s_m$  has a higher fixation probability as compared  
 213 to a neutral mutation ( $s = s_m = 0$ ) if  $R < m^{s/s_m}$  (Figure 2A), and a mutation with  
 214  $s < 0 < s_m$  has a higher fixation probability if  $R > m^{s/s_m}$ . Taken together, this means  
 215 that spatial sorting and expansion load should more readily impact populations with  
 216 high growth rates, especially if increasing dispersal rates is costly in terms of fitness.

217 Figure 3 illustrates the effect of the average migration rate at the expansion front  
 218 on the fixation probability of mutations. For very small values of  $\bar{m}_f$ , the number of  
 219 founders is close to  $F = 1$  and selection for expansion is therefore virtually absent (as in  
 220 mutation accumulation experiments). The fixation probability is then close to that of a

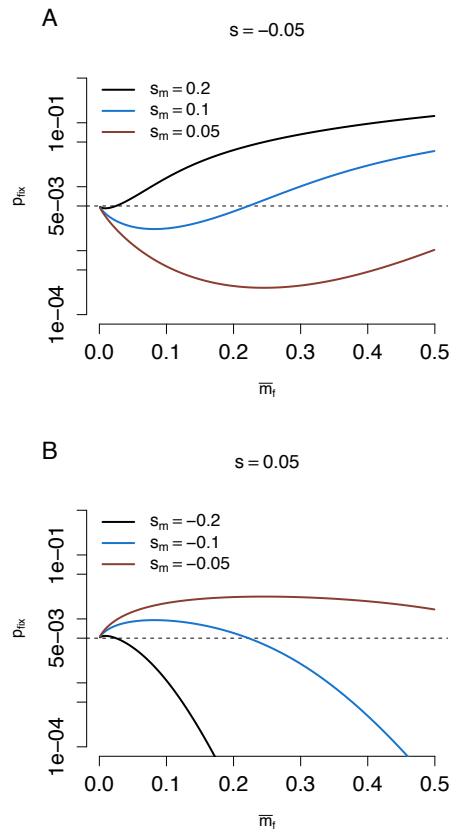

Figure 3: Fixation probability of pleiotropic mutations as a function of mean migration rate at the front.  $s$  is the selection coefficient for fitness-impacting mutations while  $s_m$  is the selection coefficient for dispersal-impacting mutations.

221 neutral mutation ( $\bar{m}_f = 0$  in Figure 3). As  $\bar{m}_f$  increases (to  $\approx 0.1$  in Figure 3) the fixation  
 222 probability of a pleiotropic mutation is driven more by the action of natural selection  
 223 rather than the action of spatial sorting. This is when  $T$  is sufficiently large to allow  
 224 the contribution of natural selection to outweigh that of spatial sorting in the effective  
 225 selection coefficient  $s_e$ . For even larger values of  $\bar{m}_f$ , the time between founder events  
 226 will decrease as propagule size increases and eventually approach  $T = 1$  such that  $s$  and  
 227  $s_m$  will contribute equally to the fixation probability. Thus, if  $s + s_m > 0$  and  $s < 0 < s_m$   
 228 (Figure 3A) or if  $s + s_m < 0$  and  $s_m < 0 < s$  (Figure 3B), the direction of selection for  
 229 pleiotropic mutations may change with increasing  $\bar{m}_f$ . A mutation with  $s < 0 < s_m$   
 230 has a higher fixation probability as compared to a neutral mutation ( $s = s_m = 0$ ) if  
 231  $\bar{m}_f > R^{s_m/s}$ . Conversely, pleiotropic mutations with  $s > 0$  and  $s_m < 0$  will have a higher  
 232 fixation probability as compared to neutral mutations if  $\bar{m}_f < R^{s_m/s}$ .

## 233 Co-evolutionary dynamics

234 We next study the co-evolution of mean fitness and migration rates in expanding popu-  
235 lations taking into account the interactions of mutation rates, the distribution of fitness  
236 effects (DFE) of new mutations, and genetic correlations in fitness and migration-related  
237 traits. In the following we assume that selection is soft such that population mean fit-  
238 ness does not affect growth rates or carrying capacities. Consequently the parameters  
239  $T$  and  $F$  are independent of the evolution of mean fitness (cf. Peischl et al., 2015), and  
240 following equation (1), the evolution of mean fitness does not impact the evolution of  
241 migration modifiers. However, the amount of migration into new empty demes affects  
242 both the parameters  $F$  and  $T$  (Peischl et al., 2015), which in turn determine the efficacy  
243 of selection and the strength of drift at the expansion front. We approximate the evolu-  
244 tion of mean fitness and migration rate, analogous to the model in Peischl et al. (2015),  
245 and consider mutations that can affect both migration rates and fitness simultaneously.  
246 Let  $u(s, s_m)$  denote the mutation rate of mutations with effect  $s$  on fitness and  $s_m$  on the  
247 migration rate. We assume that  $s$  and  $s_m$  are drawn from a bi-variate distribution with  
248 mean  $\bar{s}$  and  $\bar{s}_m$ , variance  $V_s$  and  $V_m$ , and correlation  $\rho$ . Appendix B shows that we can  
249 approximate the dynamics of mean fitness and migration rate at the front by

$$\frac{d}{dt}\bar{w}_f(t) = w(t)u \left[ (F(t) - 1) \left( \rho\sqrt{V_m V_s} + T(t)V_s \right) + \bar{s} \right] \quad (2)$$

250 and

$$\frac{d}{dt}\bar{m}_f(t) = \bar{m}_f(t)u \left[ (F(t) - 1) \left( \rho\sqrt{V_m V_s}T(t) + V_m \right) + \bar{s}_m \right], \quad (3)$$

251 where  $F(t) = K\bar{m}_f(t)/2$ ,  $T(t) = \log(2/\bar{m}_f(t))/r$  and  $u$  is rate at which new mutations  
252 occur per individual and generation.

253 In general, the mean mutational effect of mutations affecting fitness will be negative  
254 ( $\bar{s} < 0$ ) as most new incoming mutations are deleterious (Eyre-Walker and Keightley,  
255 2007). Thus, expansion load will generally occur unless one of the following is true:  
256 the variance of the distribution of fitness  $V_s$  is sufficiently large (thus increasing the  
257 proportion of beneficial variants in the DFE, see also Peischl et al. 2013), the covariance  
258 of a mutation's fitness effects with effects on migration related traits is positive and  
259 sufficiently large, or the carrying capacity of demes at the expansion front is sufficiently  
260 large. A negative correlation between fitness-related and migration-related traits can  
261 increase the chance for expansion load to occur.

262 Spatial sorting is expected to occur if there are sufficiently many new mutations  
263 that increase migration rates ( $\bar{s}_m$  or  $V_m$  large), if mutations that increase migration rates  
264 also increase fitness ( $\rho > 0$ ), or if population size is sufficiently large. If fitness- and  
265 migration-related traits are independent, that is  $\rho = 0$ , then  $\bar{s}_m \geq 0$  implies that migra-  
266 tion rates will always increase at the expansion front. If there is, however, a trade-off  
267 between migration- and fitness-related traits such that  $\rho < 0$ , the average migration rate  
268 at the front can decrease despite  $\bar{s}_m \geq 0$ . Thus, if an increase in migration is costly  
269 in terms of fitness, expansion load can constrain spatial sorting. A positive correlation  
270 between effects on migration and fitness ( $\rho > 0$ ) will generally increase the chance for  
271 spatial sorting to occur, as well as reduce the chance for expansion load to accumulate.

## 272 Evolution of dispersal can rescue expanding populations

273 While a detailed analytic analysis of eqs. (2) and (3) is mathematically challenging and  
274 beyond the scope of this paper, we can gain some intuition from the case when growth  
275 rate is strong such that newly colonized demes reach carrying capacity within a single  
276 generation ( $T = 1$ ). This is usually the case when  $r \gg 1$ . Here, we find that  $\bar{w}_f$   
277 increases over time if

$$\bar{m}_f > m_{crit,w} = 2/K(1 - \bar{s}/(V_s + \rho\sqrt{V_s V_m})) \quad (4)$$

278 and  $m_f$  increases over time if

$$\bar{m}_f > m_{crit,m} = 2/K(1 - \bar{s}_m/(V_m + \rho\sqrt{V_s V_m})). \quad (5)$$

279 Figure 4 illustrates the dynamics of mean fitness and migration rate at the expansion  
280 front as given by eqs. (2) and (3) (arrows in Figure 4) and compares these dynamics  
281 with the outcome of individual-based simulations in a serial founder effect model (as  
282 depicted in Figure 1). Even though eqs. (2) and (3) can be solved analytically, we proceed  
283 by describing the dynamics using a geometric approach that allows us to exhaustively  
284 identify all qualitatively different evolutionary regimes. If  $\bar{m}_f(0) < m_{crit,w}, m_{crit,m}$ , an  
285 expanding population will not evolve increased dispersal and will also suffer from ex-  
286 pansion load (green lines in Figure 4). On the other hand, if  $\bar{m}_f(0) > m_{crit,w}, m_{crit,m}$ ,  
287 both mean fitness and the average migration rate at the expansion front will increase

288 (red lines in Figure 4). More interestingly, if  $m_{crit,m} < \bar{m}_f(0) < m_{crit,w}$ , expansion load  
289 will accumulate and migration rates will also increase over time. Thus, we eventually  
290 observe a "rescue effect" when  $\bar{m}_f(t)$  surpasses  $m_{crit,w}$  in the sense that founder events  
291 become less drastic and selection at the expansion front becomes sufficiently efficient so  
292 that mean fitness will start to increase over time (see blue lines in Figure 4).

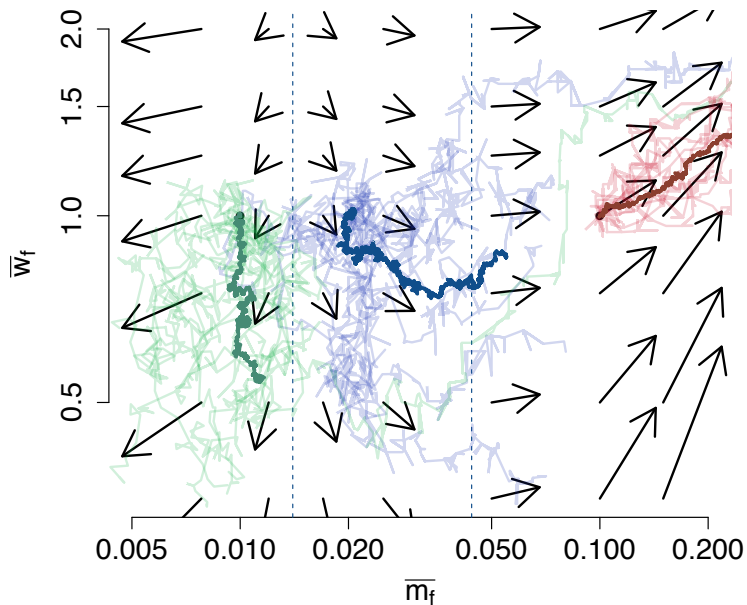

Figure 4: Individual-based simulations of the co-evolution of mean fitness and migration rate in a population undergoing serial founder events, as depicted in Figure 1. The arrows show the vector field generated by the differential equations (2) and (3), and indicate the direction of evolution as predicted by the analytic theory. The thin lines show the outcome of single simulation runs. The thick lines show the average across 10 simulation runs for each initial condition. The different colors correspond to different initial migration rates. Mutations occur at rate  $u = 0.01$  per individual per generation and their effects are drawn from a bi-variate Gaussian distribution with parameters  $\bar{s}_m = -0.001$ ,  $\bar{s} = -0.005$ ,  $V_m = 0.004$ ,  $V_s = 0.002$  and  $\rho = 0$ . The remaining parameters are  $K = 500$ ,  $\bar{w}_f(0) = 1$ , and  $\bar{m}_f = 0.01$  (green), 0.02 (blue) and 0.1 (red).

### 293 Individual-based range expansion simulations

294 Using an individual-based model first developed in Peischl et al. (2013), we simulate  
295 populations undergoing range expansions with both the evolution of dispersal and fit-  
296 ness. The key difference to the serial founder effect model in Figure 4 is that we simulate  
297 the whole species range instead of just the deme at the leading edge, and that gene flow  
298 occurs every generation rather than just during colonization events. In particular, we  
299 model a linear, 1-dimensional discrete landscape of 1000 demes with a stepping-stone

300 migration model. Each deme has a carrying capacity of  $K = 1000$  and an initial migra-  
301 tion rate  $m = 0.01$ . The 5 left-most demes are initiated at carrying capacity and burned  
302 in for 6000 generations, after which free expansion into subsequent empty demes is al-  
303 lowed. Individuals each have the potential to accumulate deleterious load through 1300  
304 bi-allelic, unconditionally deleterious loci, or increase fitness from 700 bi-allelic, uncon-  
305 ditionally beneficial loci. Fitness is multiplicative across these 2000 loci with genome-  
306 wide mutation rate  $U = 0.2$  and an equivalent potential for back-mutations to the wild  
307 type. Fitness effects are fixed at  $\pm 0.01$  and are additive (heterozygote fitness is perfectly  
308 intermediate to homozygotes). Generations are non-overlapping and growth is instan-  
309 taneous in newly-colonized demes. The dispersal trait is modelled as a quantitative trait  
310 such that each individual inherits its migration rate from as the average of both parents'  
311 trait value plus a random mutational deviation drawn from a Normal distribution with  
312 mean 0 and standard deviation 0.005 or 0.01 for either a low or high rate of dispersal  
313 evolution, respectively. Migration rate is constrained between  $0 < m < 0.5$ .

314 For these parameter values, equations (4) and (5) indicate that we expect an increase  
315 in dispersal rates independently of initial conditions, and that expansion load occurs if  
316  $\bar{m}_f \lesssim 0.07$  and ceases to occur if  $\bar{m}_f \gtrsim 0.07$ . In agreement with these predictions, we  
317 find that mutation load does accumulate during expansion as a result of gene surfing  
318 of deleterious mutations, but also that as dispersal evolves, spatial sorting leads to the  
319 rescue of fitness at the range front (Figure 5). The rescue effect is particularly strong  
320 under a higher rate of dispersal evolution (Figure 5C), where migration rate evolves to  
321 be close to 0.5. Under both low and high rates of dispersal evolution, fitness loss is  
322 reduced and then reversed, an effect opposite to that expected for fast range expansions  
323 in the absence of dispersal evolution (Gilbert et al., 2017; Hallatschek and Nelson, 2010;  
324 Peischl et al., 2013, 2015). Conversely, in the absence of the evolution of dispersal, fitness  
325 is continually lost throughout the course of expansion.

## 326 Discussion

327 The question of what makes an organism successful at colonizing new habitats is highly  
328 relevant in evolutionary biology, (Sexton et al., 2009), conservation biology (e.g., for pre-  
329 dicting invasiveness of species, Pejchar and Mooney 2009), and evolutionary medicine  
330 (e.g., in the context of cancer growth, Waclaw et al. 2015). In this work, we present an  
331 analytically tractable theoretical framework for the co-evolution of fitness- and dispersal-  
332 related traits that builds upon classical models in population genetics. We show that a

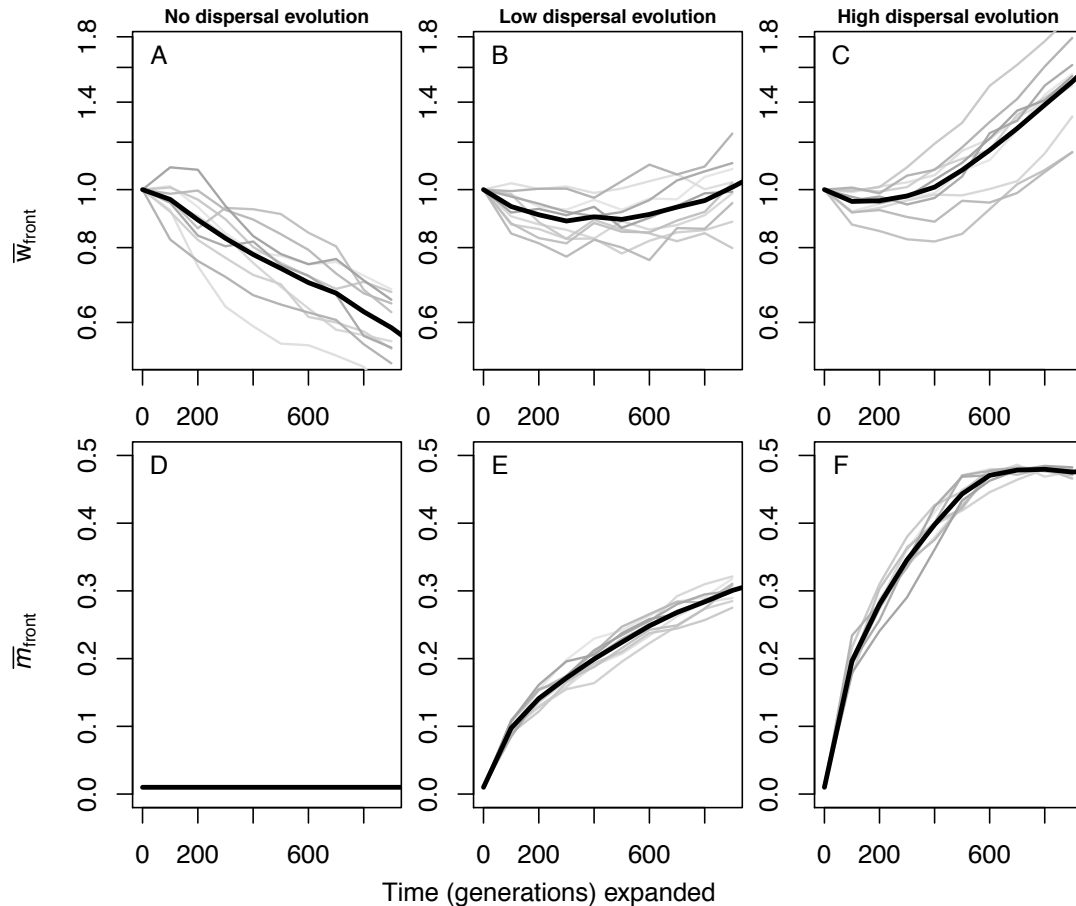

Figure 5: Fitness (A-C) or migration rate (D-F) measured at the front edge of a range expansion either in the absence of the evolution of migration or a low (standard deviation of mutational effect 0.005) or high (standard deviation of mutational effect 0.01) rate of evolution of migration. Individual replicate simulations are shown in gray while the mean is shown by the thick black line. Starting fitness is scaled to 1 for comparison, and all other parameters are as described in text.

333 given mutation with pleiotropic effects can be positively or negatively selected at the  
334 expansion front, depending on the current growth rate and migration rate at the expan-  
335 sion front (see Figures 2 and 3). Furthermore, we show that while migration rates and  
336 growth rates both affect the expansion speed in similar ways, their effect on the strength  
337 and direction of selection at the expansion front can be quite different in finite popula-  
338 tions (see Figures 2 and 3). Finally, we used our results to predict the co-evolutionary  
339 dynamics of fitness and dispersal during range expansions (see equations (2) and (3),  
340 and Figure 4). For the special case of high growth rates and soft selection, our model  
341 allowed us to exhaustively characterize the co-evolutionary dynamics, and to identify  
342 conditions when the evolution of dispersal can rescue a population from expansion load  
343 (see equations (4) and (5), and Figure 4). Individual-based simulations of range expan-  
344 sions confirmed our analytic results (see Figure 5).

345 Our study generalizes the results of [Phillips and Perkins \(2017\)](#), who studied the  
346 co-evolution of dispersal and fitness during range expansions with a constant speed of  
347 1 deme per generation ( $T = 1$ ) using a deterministic model similar to ours. As expected,  
348 in the case of infinite population size and  $T = 1$ , our results are in perfect agreement  
349 with those of [Phillips and Perkins \(2017\)](#), meaning that mutations are adaptive for ex-  
350 pansion if and only if  $s_e = s + s_m > 0$ , which, for small  $s$  and  $s_m$  is equivalent to the  
351 conditions derived in [Phillips and Perkins \(2017\)](#). We note that this condition for inva-  
352 sion of new mutations is also equivalent to the condition found by [Deforet et al. \(2017\)](#)  
353 in a deterministic continuous space model if one treats growth rate in their model as  
354 equivalent to fitness. It would be interesting to see whether and how results from deter-  
355 ministic continuous space models further generalize to finite populations, and to better  
356 understand the role of genetic correlations on spatial sorting and expansion load. A  
357 direct comparison of our results with those of [Deforet et al. \(2017\)](#) is difficult because  
358 their assumptions differ regarding the interplay of fitness, growth rates, and gene flow  
359 in the modelling approaches.

360 The simplicity of our model comes at a cost as we made several simplifying as-  
361 sumptions. Perhaps most importantly, we employ a separation of time scales argument  
362 that allows us to model evolution of the leading edge population independently from  
363 the core. We have previously shown that this is a good approximation to models with  
364 continuous gene flow between demes as long as the growth rate of the population is  
365 sufficiently large ([Peischl et al., 2013](#)). We thus expect our results to be valid even if  
366 dispersal rates are large, as long as growth rates are even larger (see [Figure 5](#) for results  
367 from individual-based simulations). If growth rates are on the order of dispersal rates  
368 or lower, we expect our model to underestimate the strength of drift because gene flow  
369 will lead to a more gradual decrease in population size towards the expansion front  
370 (c.f. [Hallatschek and Nelson, 2010](#)). Therefore, the rescue effect we identified with our  
371 model might be less relevant for species with growth rates and migration rates of sim-  
372 ilar magnitudes. In this case, a more suitable modelling approach would be assuming  
373 continuous space, e.g., using reaction-diffusion equations as in [Deforet et al. \(2017\)](#). In-  
374 cluding the effects of genetic drift, however, is somewhat harder in continuous-space  
375 models (but see e.g. [Barton et al. 2013](#); [Brunet and Derrida 2001](#); [Hallatschek 2011](#)).

376 We focused on expansion along a one-dimensional habitat. This should be a good  
377 approximation for range expansion along a narrow two-dimensional corridor ([Peischl  
378 et al., 2013](#)). In wider habitats, the evolutionary dynamics at the expansion front might



379 be quite different from what is expected in the one-dimensional case (see e.g., [Polechová](#)  
380 [and Barton, 2015](#)). In particular, lateral gene flow perpendicular to the axis of expansion  
381 can restore genetic diversity and hence prevent some of the negative consequences of  
382 increased drift at the expansion front ([Peischl et al., 2013](#)). Previous studies have shown  
383 that a wider expansion front can reduce the rate at which expansion load is built up  
384 and lead to faster recovery after the expansion ([Gilbert et al., 2018](#)). With spatial sorting  
385 it remains unclear how a two-dimensional expansion front would affect the outcome.  
386 Gene flow might have very different effects on expansion speed and genetic diversity,  
387 depending on its direction relative to the expansion axis. One might thus expect that  
388 not only the rate or distance of dispersal evolves, but also the direction of dispersal (see  
389 e.g., [Lindström et al., 2013](#)).

390 For the sake of simplicity we assumed haploid individuals, but our model can be  
391 readily extended to sexually reproducing, diploid organisms (see e.g., [Phillips and](#)  
392 [Perkins 2017](#)). Since the evolutionary dynamics of diploid and haploid individuals are  
393 equivalent in the case of co-dominant (multiplicative) mutations ([Bürger, 2000](#)), our  
394 model can be applied directly to diploid individuals. Additionally, while it would be  
395 straightforward to include dominance in our model ([Gilbert et al., 2018](#); [Peischl and](#)  
396 [Excoffier, 2015](#)), adding epistatic interactions across loci would be much more difficult.  
397 Furthermore, we ignored the effects of clonal interference in the derivation of equa-  
398 tions (1), which could lead to an overestimation of the fixation probability of beneficial  
399 mutations. Our results should be good approximations if recombination is strong or  
400 if mutations occur infrequently so that multiple segregating mutations rarely interact  
401 (that is, if  $uK < 1$ ). However, because mutations are either fixed or lost very quickly at  
402 expanding fronts, we expect our results to hold even if mutation rates are fairly high  
403 such that  $uK > 1$  (see Figure 4).

404 We assumed that selection is soft, i.e. local carrying capacities and growth rates do  
405 not depend on population mean fitness. The co-evolutionary dynamics under hard se-  
406 lection might be somewhat different from those in our our model (see e.g., [Peischl et al.,](#)  
407 [2015](#)) since growth rates and carrying capacities affect expansion speed ([Skellam, 1951](#)),  
408 the amount of genetic drift, and the efficacy of spatial sorting and natural selection at the  
409 expansion front ([Hallatschek and Nelson, 2010](#)). In particular, while increasing growth  
410 rates render natural selection at expansion fronts less efficient due to the reduced time  
411 between subsequent colonization events (see Figure 2), the efficacy of natural selection  
412 increases with increasing dispersal (see Figure 3). A model with hard selection would

413 thus lead to additional feedback between evolutionary processes at the expansion front  
414 and the efficacy of natural selection and spatial sorting.

415 We have presented a theoretical study that shows how the evolution of dispersal  
416 can serve as a factor to reduce or even eliminate expansion load. To further test our  
417 model in experimental or empirical settings, comparing fitness evolution during geo-  
418 graphic spread in tandem with dispersal evolution will prove especially illuminating.  
419 This is most approachable in experimental evolution studies where understanding these  
420 trajectories simultaneously will inform how often dispersal is positively or negatively  
421 correlated with changes in fitness. This may also provide insights into understanding  
422 the distribution of fitness effects for new mutations and for dispersal-impacting muta-  
423 tions by fitting a model to data from an experimental study (e.g., as in [Bosshard et al.](#)  
424 [2017](#)). Understanding both this correlation between fitness and dispersal as well as the  
425 distribution of effects for mutations impacting both of these characteristics is a major  
426 step forward in evolutionary biology, and could help us explain the different results  
427 already found in several experimental studies ([Bosshard et al., 2017](#); [Van Ditmarsch](#)  
428 [et al., 2013](#)). Additionally, in natural systems this interaction between dispersal and  
429 load accumulation may explain important dynamics during colonization events. Given  
430 that invasive species present as ideal candidates for accumulation of expansion load  
431 in terms of rapid expansion and small founding population sizes, yet seem to exhibit  
432 no detrimental fitness effects, this mechanism of rescue and recovery due to increased  
433 dispersal could prove as an explanatory factor in their successful invasions as well as  
434 the successful spread of other natural range expansions ([Arim et al., 2006](#); [Hanski et al.,](#)  
435 [2002](#); [Hughes et al., 2007](#); [Lombaert et al., 2014](#); [Monty and Mahy, 2010](#); [Phillips et al.,](#)  
436 [2006](#); [Simmons and Thomas, 2004](#); [Szűcs et al., 2017](#); [Tayeh et al., 2013](#); [Thomas et al.,](#)  
437 [2001](#)). The improved understanding of the evolutionary forces and interactions between  
438 changes in fitness and dispersal ability will enhance our knowledge of what makes some  
439 species particularly successful at colonization, as well as what factors might contribute  
440 to formation of species range limits.

## 441 **Acknowledgments**

442 We thank Ben Phillips for stimulating discussions on this subject, and Matteo Tomasini  
443 for helpful discussions about technical aspects of our study. KJG was supported by  
444 EMBO long-term fellowship ALTF2-2016.

445 Online Appendix

446 A Supplementary Figures

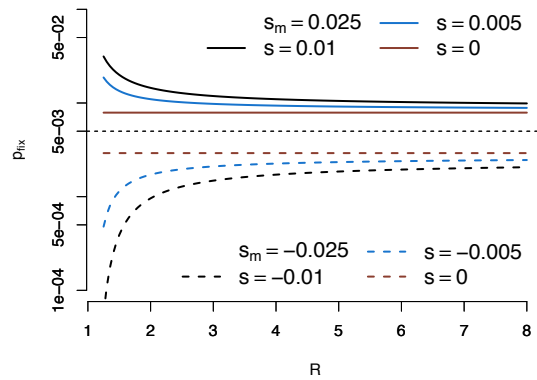

Figure S1: Fixation probability of pleiotropic mutations as a function of the population growth rate.

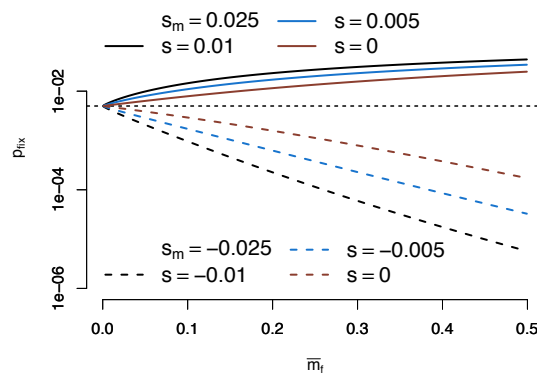

Figure S2: Fixation probability of pleiotropic mutations as a function of the mean migration rate at the expansion front.

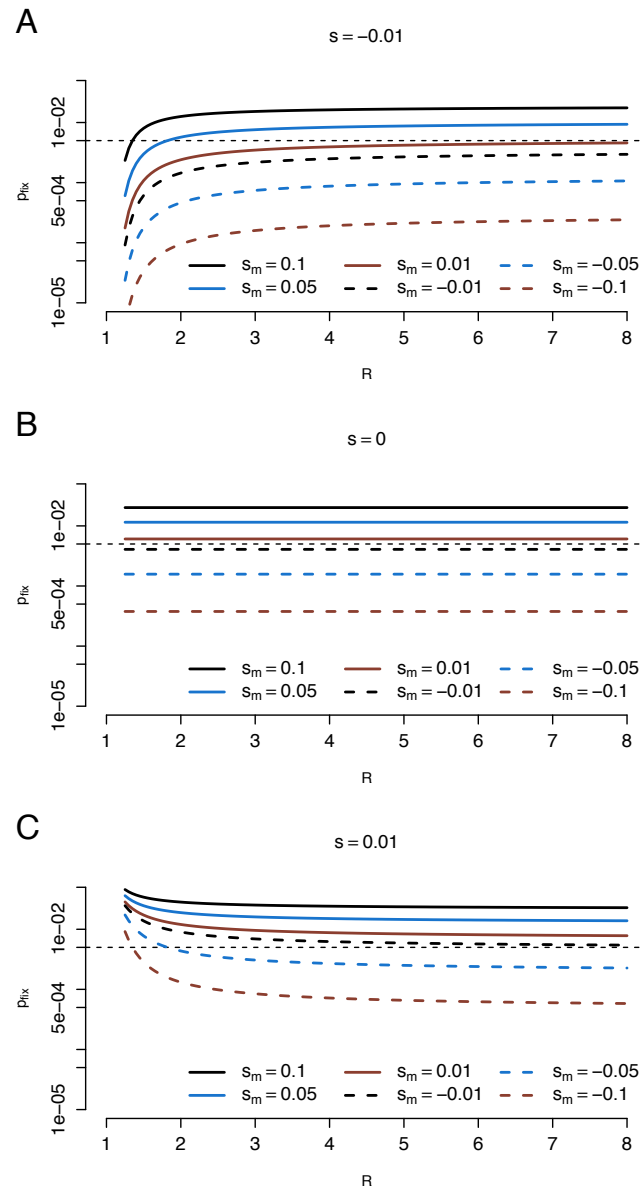

Figure S3: Fixation probability of pleiotropic mutations as a function of the population growth rate under varying scenarios of the mutational effect on fitness,  $s$ : deleterious (A), neutral (B), and beneficial (C).

## 447 B Derivation of fixation probability

We use a diffusion approach to calculate the fixation probability of a mutation that affects fitness and/or migration rates. One "generation" in the diffusion approximation corresponds to the colonization of a single deme and starts just before a new propagule disperses. We consider a mutant that is present at frequency  $p$  when the population in deme  $d_f$  is at carrying capacity  $K$ . The expected frequency of the mutant in the

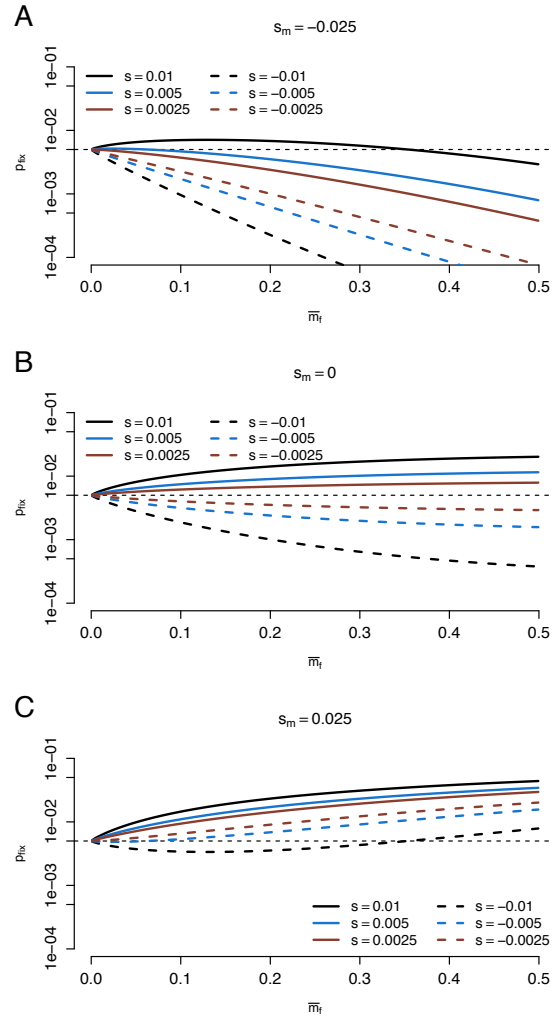

Figure S4: Fixation probability of pleiotropic mutations as a function of the mean migration rate at the expansion front.

propagule is then

$$p' = \frac{pKm_A/2}{pKm_A/2 + (1-p)Km_a/2} = p \frac{m_A}{\bar{m}_f} \left( \approx p \frac{m_A}{m_a} \text{ if } p \ll 1 \right),$$

and the variance due to binomial sampling is

$$V = \frac{1}{F} p'(1-p').$$

If the mutant's frequency in the propagule is  $p'$ , its expected frequency after the growth phase is

$$p'' = \frac{p'w_A^T}{p'w_A^T + (1-p')w_a^T} = \frac{p'(1+s)^T}{p'(1+s)^T + (1-p')}$$

which is equal to

$$p'' = \frac{p \frac{m_A}{m_f} w_A^T}{p \frac{m_A}{m_f} w_A^T + (1-p) \frac{m_a}{m_f} w_a^T} = \frac{p m_A w_A^T}{p m_A w_A^T + (1-p) m_a w_a^T}.$$

The expected change in allele frequency is then

$$E[\Delta p] = p'' - p \approx p(1-p) \left( sT + \frac{m_A}{m_a} - 1 \right).$$

We assume that the stochastic sampling effects during colonization of a deme are the main contribution of genetic drift and therefore approximate the variance in allele frequency change by

$$V[\Delta p] = \frac{1}{F} p'(1-p').$$

448 Next, we calculate the fixation probability using standard diffusion methods. The prob-  
449 ability of fixation (conditioned on initial frequency  $p_0$ ) is given by:

$$\frac{\int_0^{p_0} g(x) dx}{\int_0^1 g(x) dx},$$

450 where

$$g(x) = \exp \left[ - \int \frac{2E[\Delta p]}{V[\Delta p]} dp \right]$$

After some fundamental algebra we end up with

$$\frac{e^{-4F(sT + \frac{m_A}{m_a} - 1)p_0} - 1}{e^{-4F(sT + \frac{m_A}{m_a} - 1)} - 1},$$

451 for the fixation probability, where  $F$  is the propagule size and  $T$  is the time until a deme  
452 is filled.

Note that this is Kimura's (Kimura, 1962) original equation for the fixation probability

$$\frac{e^{-4N_e s_e p_0} - 1}{e^{-4N_e s_e} - 1},$$

with effective selection coefficient

$$s_e = sT + \frac{m_A}{m_a} - 1$$

453 and effective population size  $N_e = F$ .

## 454 C Co-evolutionary dynamics

If mutations affect only fitness but not dispersal probabilities, Peischl et al. (2015) showed that the change in mean relative fitness at the expansion front can be approximated using the following equation

$$\bar{w}_f(t+1) = \bar{w}_f(t) \left( 1 + \int_{-1}^{\infty} s u_s(s) K p(s, 0) ds \right)$$

455 where  $u_s(s)$  is the mutation rate of mutations with effect  $s$ . Here, we also assumed that  
 456 mutations evolve independently of each other, that is, we ignore clonal interference. The  
 457 parameter  $F$  measures genetic drift on the expansion front and  $T$  measures the length  
 458 of the growth period during which selection occurs. Both  $F$  and  $T$  can depend on mean  
 459 fitness, migration rates, and growth rates in models of hard selection (see Peischl et al.  
 460 2015 or Bosshard et al. 2017 for details). The integral in the equation calculates the  
 461 expected long-term effect of each new incoming mutation, that is, whether they will be  
 462 fixed or lost from the population at the expansion front, taking into account the effects of  
 463 mutation rates, random genetic drift, natural selection, and spatial sorting. This model  
 464 has been shown to be a good approximation for the evolution of mean fitness at the  
 465 front of range expansions if the growth rate of populations at the front,  $r$ , is larger than  
 466 the rate of gene flow,  $m$  (Peischl et al., 2013).

We next consider mutations that affect migration traits but have no effect on fitness. Let  $\bar{m}_f(t)$  denote the mean migration rate of the population at the edge of the expansion at time  $t$ . The evolution of  $\bar{m}_f$  can be modelled analogously via

$$\bar{m}_f(t+1) = \bar{m}_f(t) \left( 1 + \int_{-1}^{\infty} s_m u_m(s_m) K p(0, s_m) ds_m \right)$$

467 where  $u_m(s_m)$  is the mutation rate of migration modifier mutations that increase disper-  
 468 sal probabilities by a factor  $1 + s_m$ .

For pleiotropic mutations that affect both fitness and dispersal, the evolutionary dynamics of both traits follows

$$\begin{aligned} \bar{w}_f(t+1) &= \bar{w}_f(t) \left( 1 + \int_{-1}^{\infty} \int_{-1}^{\infty} s u(s, s_m) K p(s, s_m) ds ds_m \right) \\ \bar{m}_f(t+1) &= \bar{m}_f(t) \left( 1 + \int_{-1}^{\infty} \int_{-1}^{\infty} s_m u(s, s_m) K p(s, s_m) ds ds_m \right), \end{aligned}$$

469 where  $u(s, s_m)$  denotes the mutation rate of mutations with effect  $s$  on fitness and  $s_m$  on

470 the dispersal probability. We assume that  $s$  and  $s_m$  are given by a bi-variate distribution  
 471 with mean values  $\bar{s}$  and  $\bar{s}_m$ , variances  $V_s$  and  $V_m$ , and correlation  $\rho$  (e.g., a bi-variate  
 472 Normal distribution). Switching to continuous time, the dynamics can be approximated  
 473 by

$$\frac{d}{dt}\bar{w}_f(t) = \bar{w}_f(t) \int_{-1}^{\infty} \int_{-1}^{\infty} su(s, s_m)Kp(s, s_m)dsds_m \quad (\text{A1})$$

$$\frac{d}{dt}\bar{m}_f(t) = \bar{m}_f(t) \int_{-1}^{\infty} \int_{-1}^{\infty} s_mu(s, s_m)Kp(s, s_m)dsds_m. \quad (\text{A2})$$

We define

$$g(s, s_m) := sKp(s, s_m)$$

and approximate it by

$$\tilde{g}(s, s_m) = \sum_{n=0}^2 \frac{1}{n!} \left( (s - \bar{s}) \frac{\partial}{\partial s} + (s_m - \bar{s}_m) \frac{\partial}{\partial s_m} \right)^n g(s, s_m) \Big|_{(s, s_m) = (\bar{s}, \bar{s}_m)}.$$

This allows us to approximate the integrals in equations (A1) by

$$\int_{-1}^{\infty} \int_{-1}^{\infty} u(s, s_m)\tilde{g}(s, s_m)dsds_m.$$

Equation (A2) can be treated analogously. These integrals can then be solved straightforwardly but the solutions are lengthy and uninformative and hence not shown here. Importantly, however, because  $\tilde{g}(s, s_m)$  is quadratic in  $(s - \bar{s})$  and  $(s_m - \bar{s}_m)$ , the contribution of the distribution of mutational effects  $u(s, s_m)$  can be expressed solely in terms of the mean  $(\bar{s}, \bar{s}_m)$ , variances  $V_s$  and  $V_m$ , and the correlation  $\rho$ . To gain a better intuition we proceed by further approximation. We re-scale the quantities  $s_m$ ,  $\bar{s}$ ,  $\bar{s}_m$ ,  $V_s$ ,  $V_m$  and  $\rho$  by  $s$ , and expand in a Taylor series around  $s = \bar{s}$ . Ignoring third- and higher-order terms in  $s$  (and switching back to the original variables) we can then approximate the dynamics of mean fitness and migration rate at the front by

$$\frac{d}{dt}\bar{w}_f(t) = w(t)u \left[ (F(t) - 1) \left( \rho\sqrt{V_m V_s} + T(t)V_s \right) + \bar{s} \right]$$

and

$$\frac{d}{dt}\bar{m}_f(t) = \bar{m}_f(t)u \left[ (F(t) - 1) \left( \rho\sqrt{V_m V_s}T(t) + V_m \right) + \bar{s}_m \right],$$

474 where  $F(t) = K\bar{m}_f(t)/2$ ,  $T(t) = \log(2/\bar{m}_f(t))/r$  and  $u = \int_{-1}^{\infty} \int_{-1}^{\infty} u(s, s_m)dsds_m$ .



If mutations affect either migration rates or fitness, but not both, we obtain

$$\frac{d}{dt} \bar{w}_f(t) = w(t) u_s [(F(t) - 1) T(t) V_s + \bar{s}]$$

and

$$\frac{d}{dt} \bar{m}_f(t) = \bar{m}_f(t) u_m [(F(t) - 1) V_m + \bar{s}_m],$$

<sup>475</sup> where  $u_m$  and  $u_s$  are the mutation rates of migration- and fitness-related mutations,  
<sup>476</sup> respectively.

## 477 **References**

- 478 Arim, M., Abades, S. R., Neill, P. E., Lima, M., and Marquet, P. A. 2006. Spread dynamics  
479 of invasive species. *Proceedings of the National Academy of Sciences* 103:374–378.  
480 ISSN 0027-8424.
- 481 Barton, N. H., Etheridge, A. M., Kelleher, J., and Véber, A. 2013. Genetic hitchhiking in  
482 spatially extended populations. *Theoretical population biology* 87:75–89.
- 483 Bosshard, L., Dupanloup, I., Tenailon, O., Bruggmann, R., Ackermann, M., Peischl, S.,  
484 and Excoffier, L. 2017. Accumulation of deleterious mutations during bacterial range  
485 expansions. *Genetics* 207:669–684.
- 486 Bosshard, L., Peischl, S., Ackermann, M., and Excoffier, L. 2018. Genomic analysis of  
487 fast expanding bacteria reveals new molecular adaptive mechanisms. *bioRxiv* page  
488 355404.
- 489 Bouin, E. and Calvez, V. 2014. Travelling waves for the cane toads equation with  
490 bounded traits. *Nonlinearity* 27:2233.
- 491 Brown, G. P., Kelehear, C., and Shine, R. 2013. The early toad gets the worm: cane toads  
492 at an invasion front benefit from higher prey availability. *Journal of Animal Ecology*  
493 82:854–862.
- 494 Brunet, É. and Derrida, B. 2001. Effect of microscopic noise on front propagation. *Journal*  
495 *of Statistical Physics* 103:269–282.
- 496 Bürger, R., 2000. *The mathematical theory of selection, recombination, and mutation.*  
497 *John Wiley & Sons.*
- 498 Burton, O. J., Phillips, B. L., and Travis, J. M. J. 2010. Trade-offs and the evolution of  
499 life-histories during range expansion. *Ecology Letters* 13:1210–1220.
- 500 Cwynar, L. C. and MacDonald, G. M. 1987. Geographical variation of lodgepole pine in  
501 relation to population history. *The American Naturalist* 129:463–469.
- 502 Darwin, C., 1859. *On the origin of species, 1859.* Routledge.
- 503 Deforet, M., Carmona-Fontaine, C., Korolev, K. S., and Xavier, J. B. 2017. A simple  
504 rule for the evolution of fast dispersal at the edge of expanding populations. *ArXiv*  
505 *e-prints* .

- 506 Deforet, M., Van Ditmarsch, D., Carmona-Fontaine, C., and Xavier, J. B. 2014. Hyper-  
507 swarming adaptations in a bacterium improve collective motility without enhancing  
508 single cell motility. *Soft matter* 10:2405–2413.
- 509 Edmonds, C. A., Lillie, A. S., and Cavalli-Sforza, L. L. 2004. Mutations arising in the  
510 wave front of an expanding population. *Proceedings of the National Academy of*  
511 *Sciences* 101:975–979.
- 512 Eyre-Walker, A. and Keightley, P. D. 2007. The distribution of fitness effects of new  
513 mutations. *Nature Reviews Genetics* 8:610.
- 514 Fronhofer, E. A. and Altermatt, F. 2015. Eco-evolutionary feedbacks during experimental  
515 range expansions. *Nature communications* 6:6844.
- 516 Gilbert, K. J., Peischl, S., and Excoffier, L. 2018. Mutation load dynamics during  
517 environmentally-driven range shifts. *PLoS Genet* 14:e1007450.
- 518 Gilbert, K. J., Sharp, N. P., Angert, A. L., Conte, G. L., Draghi, J. A., Guillaume, F.,  
519 Hargreaves, A. L., Matthey-Doret, R., and Whitlock, M. C. 2017. Local maladaptation  
520 reduces expansion load during range expansion. *The American Naturalist* 189:368–  
521 380.
- 522 González-Martínez, S. C., Ridout, K., and Pannell, J. R. 2017. Range expansion compro-  
523 mises adaptive evolution in an outcrossing plant. *Current Biology* 27:2544–2551.
- 524 Hallatschek, O. 2011. The noisy edge of traveling waves. *Proceedings of the National*  
525 *Academy of Sciences* 108:1783–1787.
- 526 Hallatschek, O. and Nelson, D. R. 2010. Life at the front of an expanding population.  
527 *Evolution* 64:193–206.
- 528 Hanski, I., Breuker, C. J., Schöps, K., Setchfield, R., and Nieminen, M. 2002. Popula-  
529 tion history and life history influence the migration rate of female glanville fritillary  
530 butterflies. *Oikos* 98:87–97.
- 531 Henn, B. M., Botigue, L. R., Peischl, S., Dupanloup, I., Lipatov, M., Maples, B. K., Martin,  
532 A. R., Musharoff, S., Cann, H., Snyder, M. P., et al. 2016. Distance from sub-saharan  
533 africa predicts mutational load in diverse human genomes. *Proceedings of the Na-*  
534 *tional Academy of Sciences* 113:E440–E449.

- 535 Hughes, C. L., Dytham, C., and Hill, J. K. 2007. Modelling and analysing evolution  
536 of dispersal in populations at expanding range boundaries. *Ecological Entomology*  
537 32:437–445.
- 538 Hughes, C. L., Hill, J. K., and Dytham, C. 2003. Evolutionary trade-offs between repro-  
539 duction and dispersal in populations at expanding range boundaries. *Proceedings of*  
540 *the Royal Society of London B: Biological Sciences* 270:S147–S150.
- 541 Kimura, M. 1962. On the probability of fixation of mutant genes in a population.  
542 *Genetics* 47:713.
- 543 Klopstein, S., Currat, M., and Excoffier, L. 2006. The fate of mutations surfing on the  
544 wave of a range expansion. *Molecular Biology and Evolution* 23:482–490.
- 545 Lindström, T., Brown, G. P., Sisson, S. A., Phillips, B. L., and Shine, R. 2013. Rapid  
546 shifts in dispersal behavior on an expanding range edge. *Proceedings of the National*  
547 *Academy of Sciences* 110:13452–13456.
- 548 Lombaert, E., Estoup, A., Facon, B., Joubard, B., Grégoire, J.-C., Jannin, A., Blin, A.,  
549 and Guillemaud, T. 2014. Rapid increase in dispersal during range expansion in the  
550 invasive ladybird *harmonia axyridis*. *Journal of evolutionary biology* 27:508–517.
- 551 Monty, A. and Mahy, G. 2010. Evolution of dispersal traits along an invasion route in  
552 the wind-dispersed *senecio inaequidens* (asteraceae). *Oikos* 119:1563–1570.
- 553 Peischl, S., Dupanloup, I., Foucal, A., Jomphe, M., Bruat, V., Grenier, J.-C., Gouy, A.,  
554 Gilbert, K., Gbeha, E., Bosshard, L., et al. 2018. Relaxed selection during a recent  
555 human expansion. *Genetics* 208:763–777.
- 556 Peischl, S., Dupanloup, I., Kirkpatrick, M., and Excoffier, L. 2013. On the accumulation  
557 of deleterious mutations during range expansions. *Molecular ecology* 22:5972–5982.
- 558 Peischl, S. and Excoffier, L. 2015. Expansion load: recessive mutations and the role of  
559 standing genetic variation. *Molecular ecology* 24:2084–2094.
- 560 Peischl, S., Kirkpatrick, M., and Excoffier, L. 2015. Expansion load and the evolutionary  
561 dynamics of a species range. *The American Naturalist* 185:E81–E93.
- 562 Pejchar, L. and Mooney, H. A. 2009. Invasive species, ecosystem services and human  
563 well-being. *Trends in ecology & evolution* 24:497–504.

- 564 Phillips, B. and Perkins, A. 2017. The population genetics of spatial sorting. bioRxiv  
565 page 210088.
- 566 Phillips, B. L., Brown, G. P., Travis, J. M., and Shine, R. 2008. Reid's paradox revisited:  
567 the evolution of dispersal kernels during range expansion. *the american naturalist*  
568 172:S34–S48.
- 569 Phillips, B. L., Brown, G. P., Webb, J. K., and Shine, R. 2006. Invasion and the evolution  
570 of speed in toads. *Nature* 439:803.
- 571 Polechová, J. and Barton, N. H. 2015. Limits to adaptation along environmental gradi-  
572 ents. *Proceedings of the National Academy of Sciences* ISSN 0027-8424.
- 573 Sexton, J. P., McIntyre, P. J., Angert, A. L., and Rice, K. J. 2009. Evolution and ecology  
574 of species range limits. *Annual review of ecology, evolution, and systematics* 40.
- 575 Shine, R., Brown, G. P., and Phillips, B. L. 2011. An evolutionary process that assembles  
576 phenotypes through space rather than through time. *Proceedings of the National*  
577 *Academy of Sciences* 108:5708–5711. ISSN 0027-8424.
- 578 Simmons, A. D. and Thomas, C. D. 2004. Changes in dispersal during species' range  
579 expansions. *The American Naturalist* 164:378–395.
- 580 Skellam, J. G. 1951. Random dispersal in theoretical populations. *Biometrika* 38:196–218.
- 581 Slatkin, M. and Excoffier, L. 2012. Serial founder effects during range expansion: a  
582 spatial analog of genetic drift. *Genetics* 191:171–181.
- 583 Szücs, M., Vahsen, M. L., Melbourne, B. A., Hoover, C., Weiss-Lehman, C., and Huf-  
584 bauer, R. A. 2017. Rapid adaptive evolution in novel environments acts as an architect  
585 of population range expansion. *Proceedings of the National Academy of Sciences*  
586 114:13501–13506. ISSN 0027-8424.
- 587 Tayeh, A., Estoup, A., Hufbauer, R. A., Ravigné, V., Goryacheva, I., Zakharov, I., Lom-  
588 baert, E., and Facon, B. 2013. Investigating the genetic load of an emblematic invasive  
589 species: the case of the invasive harlequin ladybird *harmonia axyridis*. *Ecology and*  
590 *evolution* 3:864–871.
- 591 Thomas, C. D., Bodsworth, E., Wilson, R. J., Simmons, A. D., Davies, Z. G., Musche,  
592 M., and Conradt, L. 2001. Ecological and evolutionary processes at expanding range  
593 margins. *Nature* 411:577.

- 594 Travis, J. M. and Dytham, C. 2002. Dispersal evolution during invasions. *Evolutionary*  
595 *Ecology Research* 4:1119–1129.
- 596 Travis, J. M., Münkemüller, T., Burton, O. J., Best, A., Dytham, C., and Johst, K. 2007.  
597 Deleterious mutations can surf to high densities on the wave front of an expanding  
598 population. *Molecular biology and evolution* 24:2334–2343.
- 599 Van Ditmarsch, D., Boyle, K. E., Sakhtah, H., Oyler, J. E., Nadell, C. D., Déziel, É.,  
600 Dietrich, L. E., and Xavier, J. B. 2013. Convergent evolution of hyperswarming leads  
601 to impaired biofilm formation in pathogenic bacteria. *Cell reports* 4:697–708.
- 602 Van Dyken, J. D., Müller, M. J., Mack, K. M., and Desai, M. M. 2013. Spatial popula-  
603 tion expansion promotes the evolution of cooperation in an experimental prisoner’s  
604 dilemma. *Current Biology* 23:919–923.
- 605 Waclaw, B., Bozic, I., Pittman, M. E., Hruban, R. H., Vogelstein, B., and Nowak, M. A.  
606 2015. A spatial model predicts that dispersal and cell turnover limit intratumour  
607 heterogeneity. *Nature* 525:261.
- 608 Weiss-Lehman, C., Hufbauer, R. A., and Melbourne, B. A. 2017. Rapid trait evolu-  
609 tion drives increased speed and variance in experimental range expansions. *Nature*  
610 *communications* 8:14303.
- 611 Willi, Y., Fracassetti, M., Zoller, S., and Van Buskirk, J. 2018. Accumulation of mutational  
612 load at the edges of a species range. *Molecular biology and evolution* 35:781–791.
